# Supplementary material for: High-transparency, weather-resistant nanocomposite coatings from a shear-aligned 2D unit-cell-thick perovskite for wooden artifact preservation
Source: Royal Society of Chemistry journal article supplement (doi:10.1039/d4ta08935a), 2025-01-01
Supplement: d4ta08935a1.pdf [file d4ta08935a1.pdf]

Supplementary Information

# High-Transparency, Weather-Resistant Nanocomposite Coatings from Shear-Aligned 2D Unit-Cell-Thick Perovskite for Wooden Artifact Preservation

Zhuangzhuang Li,<sup>†a</sup> Ya Nan Ye,<sup>†a</sup> Beibei Kang,<sup>a</sup> Yiming Hua,<sup>a</sup> Zhe Wang,<sup>a</sup> Dongdong Yan,<sup>a</sup> Huijie Zhou,<sup>a</sup> Wenwen Yu,<sup>a</sup> Shilei Zhu<sup>\*a,b</sup>

<sup>a</sup> *College of Materials Science and Engineering, Taiyuan University of Technology, Taiyuan 030024, China.*

<sup>b</sup> *College of Physics and Optoelectronics, Taiyuan University of Technology, Taiyuan 030024, China.*

<sup>†</sup>These authors contributed equally.

**Table S1.** The variation of resin viscosity with different PNS contents

| PNS Contents (wt%) | 0     | 1     | 2     | 3     | 4     |
|--------------------|-------|-------|-------|-------|-------|
| Viscosity (mpa·s)  | 171.3 | 189.7 | 215.4 | 232.2 | 247.9 |

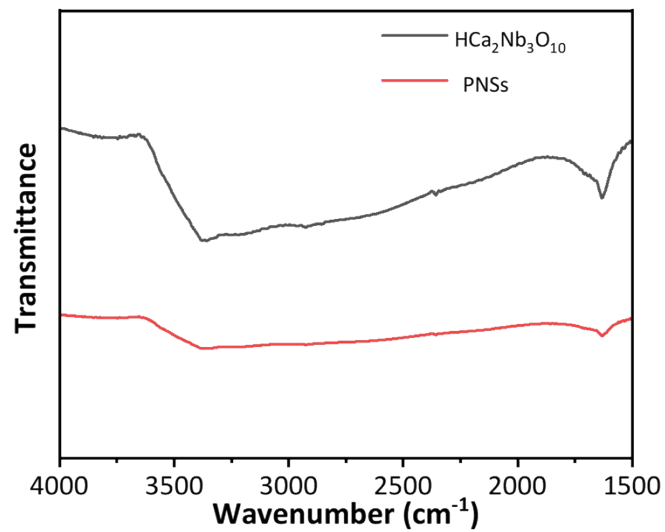

**Figure S1.** Fourier Transform Infrared (FTIR) spectroscopy spectra of HCa<sub>2</sub>Nb<sub>3</sub>O<sub>10</sub> and PNSs.

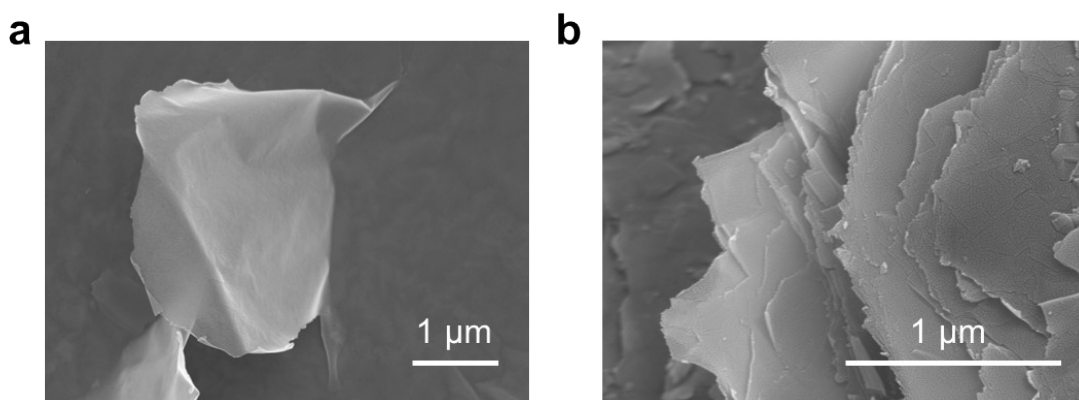

**Figure S2.** Scanning electron microscopy (SEM) images of the PNSs.

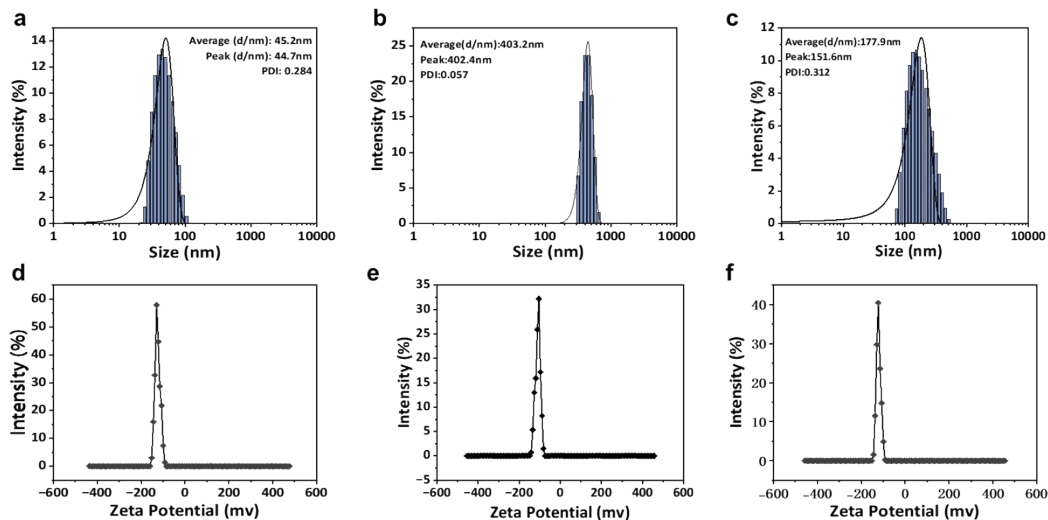

**Figure S3.** Dynamic Light Scattering (DLS) size distribution histogram and Zeta potential distribution diagram for AR, PNS and PNS-AR aqueous solutions with 3 wt% PNS content.

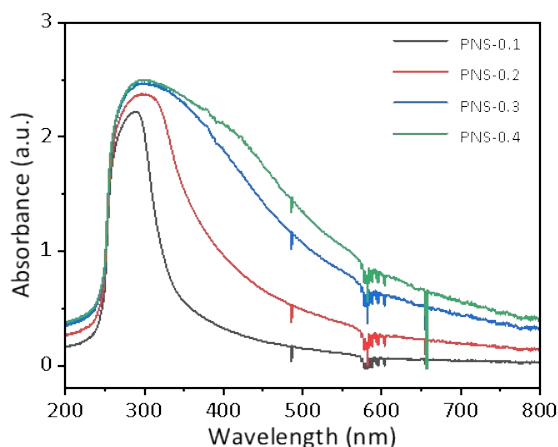

**Figure S4.** UV-Vis absorption spectra of PNS dispersion in water with different PNS contents.

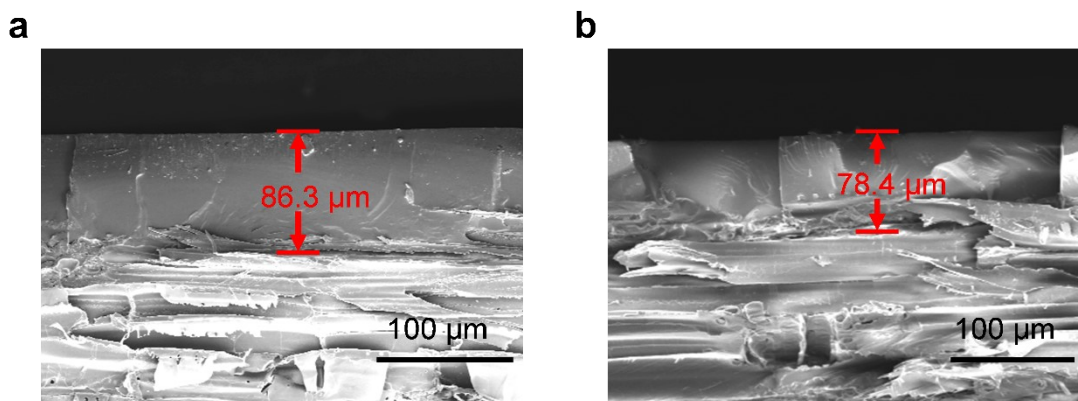

**Figure S5.** SEM images of the cross-sections of wooden blocks with (a) AR and (b) PNS-AR coatings.

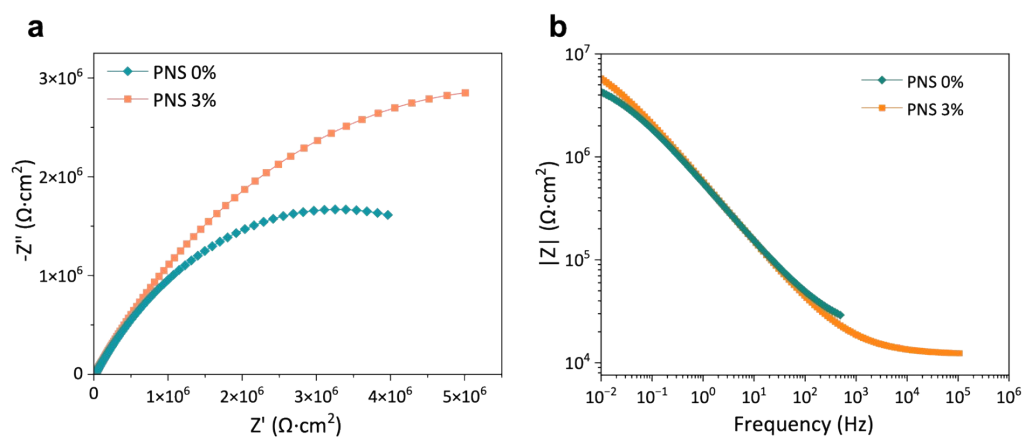

**Figure S6.** Electrochemical impedance spectroscopy (EIS) analysis of the composite coatings. (a) Nyquist plot showing the higher impedance of the PNS-AR coating compared to the AR coating. (b) Bode plot demonstrating the increased impedance modulus at low frequency for the PNS-AR coating, indicating superior electrochemical protection.
